# Supplementary material
Source: PubMed Central journal article supplement (PMC3126134)

Fig. S1

# PFV Gag

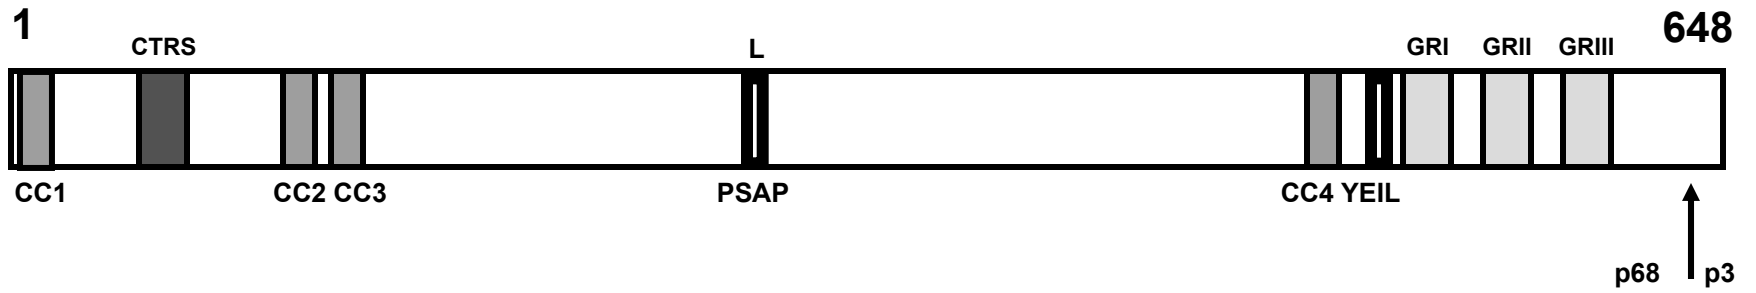

Fig. S2

```
1 atggcttcaggaagtaattgtgaagaatatgaacttgatggtgaagctctggttgaattttaagagatagaaatataccaagaatcctttacatggagaagtatatag
M141
111 tcttcgccttactgaaggatggtggggacaaattgagagatctcagatggtacgctctaattacaagatgatgataatgaacctttacagagacctagatagaggtaa
M142
221 tacaacgagctgtaaaccctcatacaatgtttatgatatacaggaccattagctgaacctcaattagccttcaggatttagatttacctgaaggctccattgaggtttggt
331 ccattggcaaatggacattatggtcaaggagatccttatagtagtcttacagaccagtaacaatggccgaacagcccaaatgactagagatgaactggaagatgttct
441 taatactcaaagtgaatagaaattcaaatgataaatttatggagttgatgaagttgaaactagagctcttagaagacaattagctgagagatctagtacagggcaag
M143
551 gaggaatatccccaggagctcctcgttctcgaccaccagtaagcagcttctcagggttaccaagtttgcctctatacctgggattcatcccagggcaccttcacctcca
661 agggcaacttctactcccggaatattccttgagtttaggagatgatagcccacctctcatctagtttctctggacctctcaacctcgtgttcttccatccgggaaa
771 tccttttgtgaagaagaaggctacagacctagatcccagctctagagaaaggagaagaaattcttctcgtcctgtaccgtcagcacctcctatgattcagtatatac
M144 M145
881 cagtaccacctccaccaccgatggcagcgttatacctatcagcatalcagatctgtaactggagcctcctagaaacccaagagaaataccaatttggtcaggacga
991 aatgctcctgctatagatggagtgctccctgttacaacaccggatcaagatgcagaataaataatgctatactaggaggaaatattgggctatcattaaccctggaga
M158
1101 ctgtttaacatgggactcagcagtagccacctatatttagaacccatggaactttccaatgcatcagcttgaaatgtaataaaaggcatagttgatcaagaaggag
1211 tggcaacagcatatactttgggaatgatgctttctggacaaaaattacaattagtttctggaataattagaggatattgcttgacaagctgtagtaactgcattaaa
1321 cagcgtttagaccaagaatagatgatcaacaagagcagagactttattcaacatctaatactgctgtatatgaaatttaggccttaatgccagaggacaaagtatacg
1431 tgcctcagtgactcctcaacccccaccatccagaggtagaggtcgaggtcaaaatacttctagaccctctcaaggaccagctaatagcggcggggacgacagcgcctg
1541 cttctggtcaaagcaacagaggatctagtagctcagaatcaaaatcaagataattaaatcaaggaggatataatcttcgaccccgacttaccaacctcaaaggtacgga
1651 ggaggcgtggacgaagatggaacgataataactaacaatcaagagtcagaccatcagatcaaggttctcaactcctaggccaaatcaagcaggctctggggtgcgtgg
1761 caatcagtcacaaactcccagaccagctgctggtcgcgagggaagaggttaaccacaaccgaaaccaacgatcatccggtgctggtgactcacgcgctgtcaataccgtga
1871 cacagagtccacgtcctccacagatgaatcctcttcagctgttacagccgcttccggcgagatcaaaggactaa
```

Fig. S3

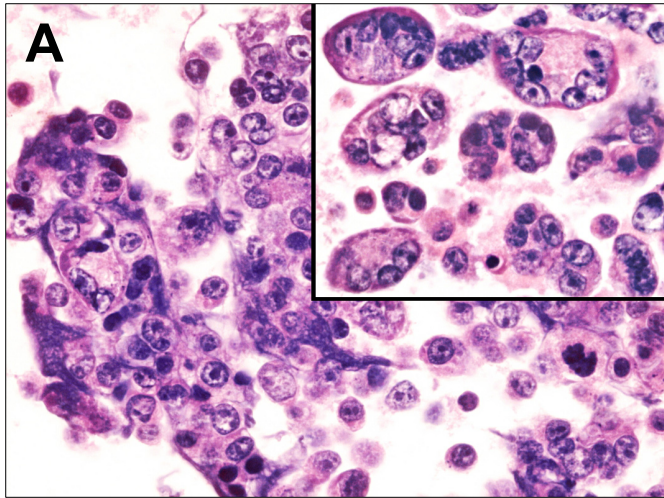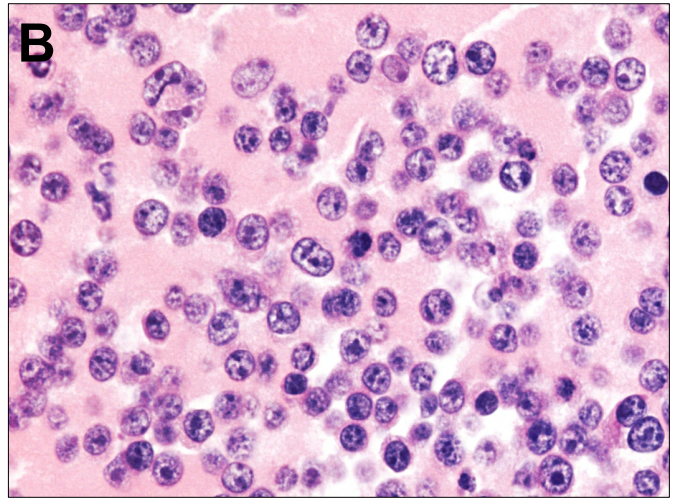

Fig. S4

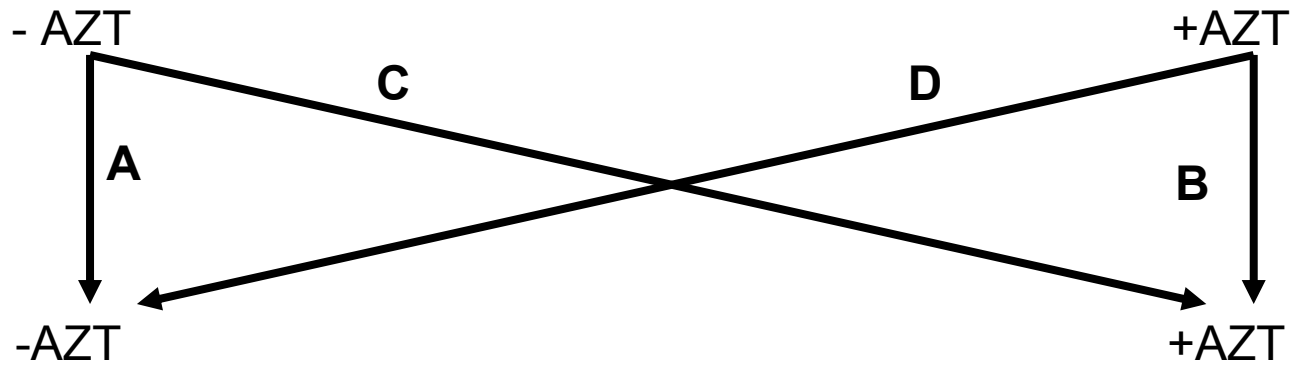

| virus       | A (-AZT/-AZT)             | B (+AZT/+AZT) | C (-AZT/+AZT)             | D (+AZT/-AZT) |
|-------------|---------------------------|---------------|---------------------------|---------------|
| wt (pcPFV2) | $1.3 \pm 0.7 \times 10^7$ | $4.0 \pm 1.7$ | $8.6 \pm 8.1 \times 10^6$ | $6.7 \pm 0.7$ |
| M 141       | $1.8 \pm 0.4 \times 10^5$ | $3.3 \pm 0.7$ | $1.5 \pm 0.7 \times 10^4$ | $5.0 \pm 1.0$ |
| M 142       | $1.6 \pm 0.7 \times 10^7$ | $5.3 \pm 1.2$ | $2.6 \pm 1.4 \times 10^6$ | $6.7 \pm 1.3$ |
| M 143       | $1.6 \pm 0.7 \times 10^7$ | $3.7 \pm 1.8$ | $5.2 \pm 4.0 \times 10^6$ | $4.7 \pm 1.8$ |
| M 144       | $5.3 \pm 2.2 \times 10^6$ | $5.0 \pm 1.0$ | $5.3 \pm 2.3 \times 10^6$ | $5.7 \pm 1.8$ |
| M 145       | $3.6 \pm 1.8 \times 10^6$ | $3.3 \pm 1.5$ | $1.4 \pm 1.0 \times 10^6$ | $4.7 \pm 1.7$ |

Fig. S5

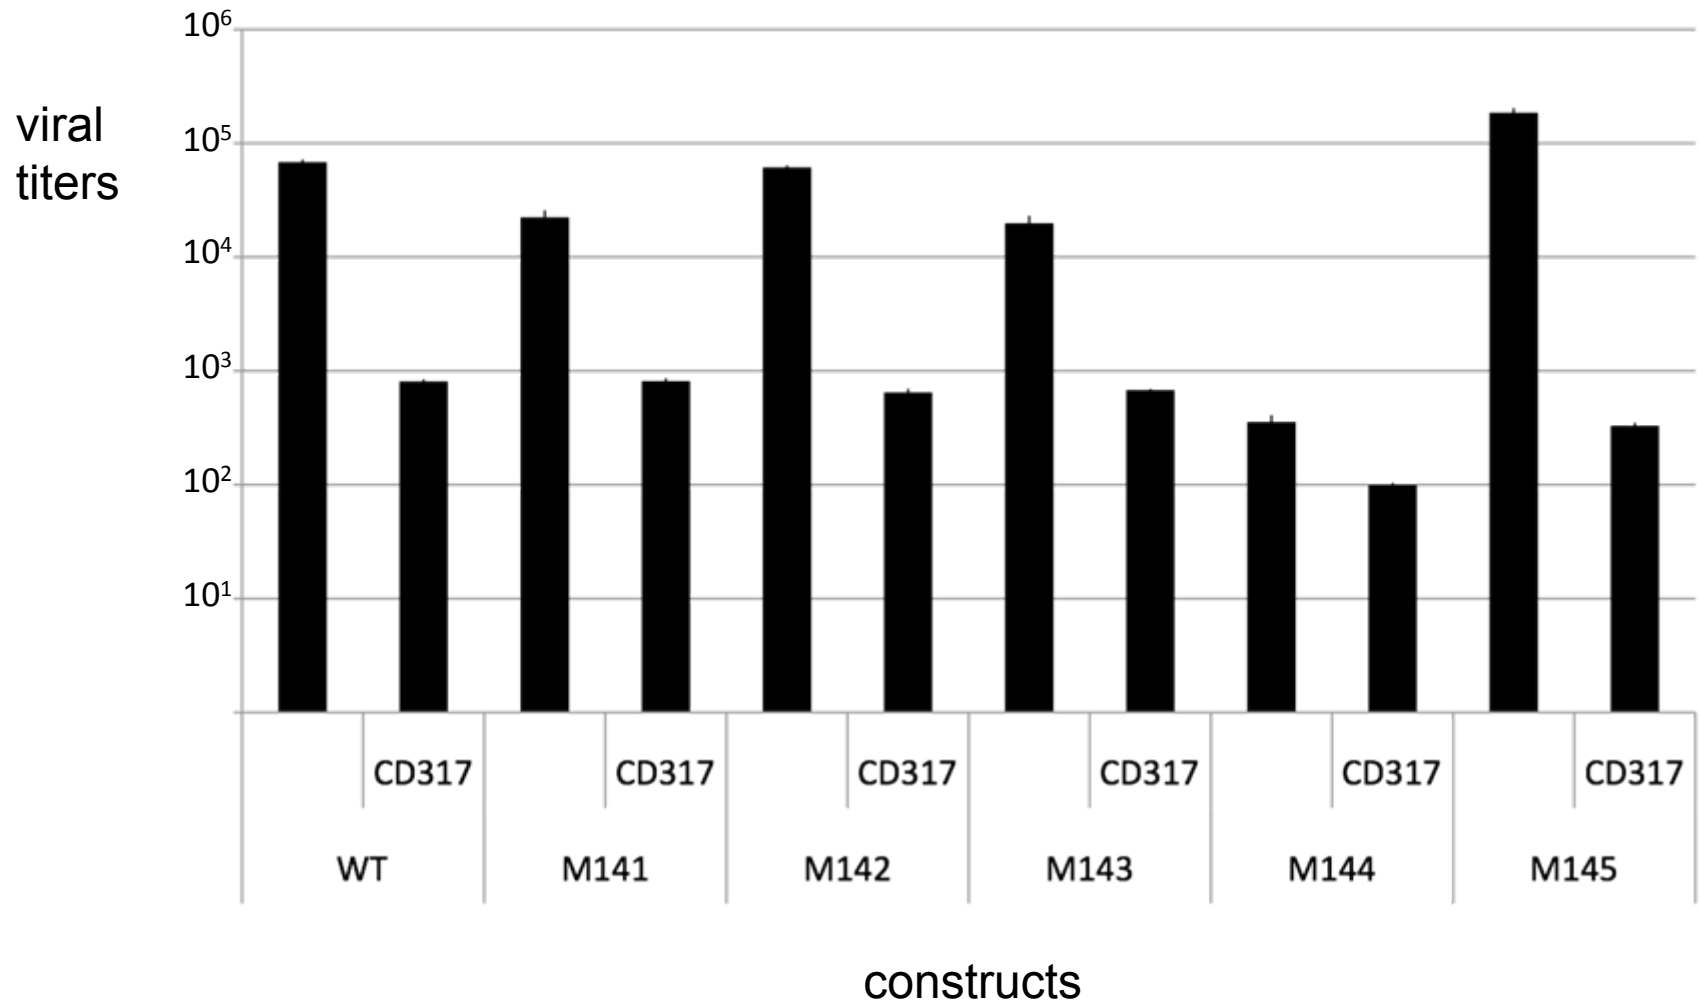

Supplement: supp_85_8_3986__1.pdf [file supp_85_8_3986__1.pdf]
